# Supplementary material for: Metabolomic and bioenergetic responses of human hepatocellular carcinoma cells following exposure to commercial copper hydroxide nanopesticide
Source: Royal Society of Chemistry journal article supplement (doi:10.1039/d1en00790d), 2021-12-15
Supplement: d1en00790d1.pdf [file d1en00790d1.pdf]

Table S1 Primers used for real-time PCR analysis

| Symbol  | Gene Name                                                                            | Forward Primer (5'-3')     | Reverse Primer (5'-3')     | References             |                   |
|---------|--------------------------------------------------------------------------------------|----------------------------|----------------------------|------------------------|-------------------|
| pdk4    | Pyruvate dehydrogenase kinase 4                                                      | GACCCAGTCACCAATCAAAATCT    | GGTTCATCAGCATCCGAGTAGA     | Yue et al., 2019       |                   |
| pdk3    | Pyruvate dehydrogenase kinase 3                                                      | TGGCGCCATTACAAGACCAC       | CAGAGAGGACCACAGCATTCA      |                        |                   |
| pdk2    | Pyruvate dehydrogenase kinase 2                                                      | ATGAAAGAGATCAACCTGCTTCC    | GGCTCTGGACATACCAGCTC       |                        |                   |
| pdk1    | Pyruvate dehydrogenase kinase 1                                                      | GGATTGCCCATATCACGTCTTT     | TCCCGTAACCCTCTAGGGAATA     |                        |                   |
| kgdh    | Ketoglutarate dehydrogenase                                                          | GGCTTCCCAGACTGTTAAGAC      | GCAGAAATAGCACCGAATCTGTTG   |                        |                   |
| idh3b   | Isocitrate dehydrogenase (NAD(+)) 3 non-catalytic subunit beta                       | TAGTGCAGAATACGCAGTCTTTG    | CAGCATGTTGGAAGCCGAC        |                        |                   |
| idh3a   | Isocitrate dehydrogenase (NAD(+)) 3 catalytic subunit alpha                          | AGCCGGTCACCCATCTATGAA      | TAGAGACACATGGTCGGACAT      |                        |                   |
| idh2    | Isocitrate dehydrogenase (NADP(+)) 2                                                 | CGCCACTATGCCGACAAAAG       | ACTGCCAGATAATACGGGTCA      |                        |                   |
| idh1    | Isocitrate dehydrogenase (NADP(+)) 1                                                 | AGAAGCATAATGTTGGCGTCA      | CGTATGGTGCCATTTGGTGATT     |                        |                   |
| cpt1    | Carnitine palmitoyltransferase 1                                                     | CAGCATATGTATCGCCTCGC       | CTGGACACGTAATCTGGGTT       |                        | Gong et al., 2021 |
| cpt2    | Carnitine palmitoyltransferase 2                                                     | TACGAGTCCTGTAGCACTGC       | AACAAGTGTCCGGTCAAAGCC      |                        |                   |
| acs11   | Acyl-CoA synthetase long chain family member 1                                       | GCCTCTCGCCCATATGTTTG       | CATCCGGTTCAGCAGTCTTG       |                        |                   |
| acox1   | Acyl-CoA oxidase 1                                                                   | GTGACATCGGCCCAAATTT        | AACACCATGGTCCCCTAAGT       | Guo et al., 2021       |                   |
| glut1   | Glucose transporter 1                                                                | CGG GCC AAG AGT GTG CTA AA | TGA CGA TAC CGG AGC CAA TG |                        |                   |
| acc     | Acetyl-CoA carboxylase                                                               | GCTGCTCGGATCACTAGTGAA      | TTCTGCTATCAGTCTGTCCAG      | Shen et al., 2021      |                   |
| fas     | Fatty acid synthase                                                                  | GAAACTGCAGGAGCTGTC         | CACGGAGTTGAGGCGGAT         |                        |                   |
| cox6a1  | Cytochrome c oxidase subunit 6A1                                                     | CCACTTCCAACCTGGCTACGA      | AAGCAAAGGGATGGGAGACC       | Derambure et al., 2017 |                   |
| ndufs1  | NADH ubiquinone oxidoreductase core subunit S1                                       | ACCGAGCCAATGGTCAGAAA       | CTGCAACATTCCAGCTACGC       | Dziegala et al., 2018  |                   |
| uqcrfs1 | Ubiquinol-cytochrome c reductase, Rieske iron-sulfur polypeptide 1                   | AACCCCTGTTTGTGCGTCAT       | TTGAGAGGAGCAGGACCCAA       |                        |                   |
| cox4i1  | Cytochrome c oxidase subunit 4I1                                                     | ACGAGTGAAGACGGTTGTG        | AGGGGGCCGTACACATAGT        |                        |                   |
| atp5b   | ATP synthase, H <sup>+</sup> transporting, mitochondrial F1 complex beta polypeptide | AGACTGGTTTTGGAGGTGCGC      | GGCCAAAGTCTCAGGACCAA       |                        |                   |

Derambure C, Dzangue-Tchoupou G, Berard C, Vergne N, Hiron M, D'Agostino MA, et al. Pre-silencing of genes involved in the electron transport chain (ETC) pathway is associated with responsiveness to abatacept in rheumatoid arthritis. *Arthritis. Res. Ther.* 2017, 19: 109.

Dziegala M, Kobak KA, Kasztura M, Bania J, Josiak K, Banasiak W, et al. Iron depletion affects genes encoding mitochondrial electron transport chain and genes of non-oxidative metabolism, pyruvate kinase and lactate dehydrogenase, in primary human cardiac myocytes cultured upon mechanical stretch. *Cells.* 2018, 7.

Gong Y, Geng N, Zhang H, Luo Y, Giesy JP, Sun S, et al. Exposure to short-chain chlorinated paraffins inhibited PPARalpha-mediated fatty acid oxidation and stimulated aerobic glycolysis in vitro in human cells. *Sci. Total Environ.* 2021, 772: 144957.

Guo HJ, Li HY, Chen ZH, Zhou WJ, Li JJ, Zhang JY, et al. NAMPT promotes hepatitis B virus replication and liver cancer cell proliferation through the regulation of aerobic glycolysis. *Oncol. Lett.* 2021, 21: 390.

Shen M, Xu M, Zhong F, Crist MC, Prior AB, Yang K, et al. A multi-omics study revealing the metabolic effects of estrogen in liver cancer cells HepG2. *Cells.* 2021, 10.

Yue S, Yu J, Kong Y, Chen H, Mao M, Ji C, et al. Metabolomic modulations of HepG2 cells exposed to bisphenol analogues. *Environ. Int.* 2019, 129: 59-67.

Table S2 Quantitative results of the copper hydroxide nanopesticide and copper ions in metabolomics analyses. Table indicated the influence of the nanopesticide and ions on the energy metabolites of cells. The numbers were the ratio of the treated mean divided by the control mean or the nanopesticide treated mean divided by the ions treated mean, and the statistical significance *p* value. Symbol (\*) represented the *p* < 0.05 as compared with the control. Symbol (#) represented the *p* < 0.05 as compared with the copper ions. NA indicated not available.

| Metabolites                           | Energy pathway                           | Nano-Cu(OH) <sub>2</sub> | Ion-CuSO <sub>4</sub> | Ion-Nano     |
|---------------------------------------|------------------------------------------|--------------------------|-----------------------|--------------|
| Citrate/Citric acid                   | TCA                                      | 2.91/<0.0001*            | 4.22/<0.0001*         | 1.45/0.0008# |
| Aconitate                             | TCA                                      | 1.89/<0.0001*            | 2.86/<0.0001*         | 1.51/0.0014# |
| Isocitrate                            | TCA                                      | 0.81/0.0005              | 0.89/0.0405           | 1.11/0.0821  |
| Alpha-Ketoglutaric Acid               | TCA                                      | 1.35/0.0437*             | 2.30/<0.0001*         | 1.70/0.0003# |
| Succinyl-CoA                          | TCA                                      | NA                       | NA                    | NA           |
| Succinate/Succinic acid               | TCA                                      | 1.58/0.0006*             | 1.77/<0.0001*         | 1.12/0.1961  |
| Fumarate/Fumaric acid                 | TCA                                      | 3.38/0.0004*             | 4.82/<0.0001*         | 1.42/0.0272# |
| Malate                                | TCA                                      | 2.63/<0.0001*            | 3.60/<0.0001*         | 1.37/0.0038# |
| Oxaloacetate                          | TCA                                      | 1.47/0.0218*             | 1.52/0.0957           | 1.04/0.8577  |
| Pyruvate/Pyruvic acid                 | TCA                                      | NA                       | NA                    | NA           |
| Acetyl-CoA                            | TCA                                      | 1.24/0.0021*             | 1.32/0.0003*          | 1.07/0.1847  |
| Glutaryl-CoA                          | TCA                                      | NA                       | NA                    | NA           |
| Thiamine pyrophosphate (TPP)          | TCA                                      | 1.38/0.0071*             | 1.35/0.0023*          | 0.98/0.8306  |
| Guanosine diphosphate (GDP)           | TCA                                      | 1.69/0.0014*             | 1.78/0.0004*          | 1.05/0.6385  |
| Guanosine triphosphate (GTP)          | TCA                                      | 1.60/0.0176*             | 2.51/0.0003*          | 1.57/0.0168# |
| AMP                                   | TCA/glycolysis                           | 0.79/0.0334*             | 0.59/<0.0001*         | 0.76/0.0544  |
| ADP                                   | TCA/glycolysis/oxidative phosphorylation | 1.16/0.0676              | 1.18/0.0337           | 1.02/0.8311  |
| ATP                                   | TCA/glycolysis/oxidative phosphorylation | 1.97/<0.0001*            | 2.52/<0.0001*         | 1.28/0.0102# |
| cyclic-AMP                            | AMP derivative                           | 0.70/0.0004*             | 0.62/<0.0001*         | 0.88/0.1046  |
| D-Glucose-6-phosphate (G6P)           | glycolysis                               | 0.99/0.9227              | 1.22/0.1499           | 1.23/0.1491  |
| Beta-D-Fructose 6 phosphate (β-D-F6P) | glycolysis                               | 1.36/0.0019*             | 1.68/0.0004*          | 1.23/0.0268# |
| Fructose-1,6-biphosphate              | glycolysis                               | 1.05/<0.0001             | 1.08/0.0006           | 1.03/0.0831  |
| 3-Phosphoglycerate (3PG)              | glycolysis                               | 1.84/0.0014*             | 1.85/<0.0001*         | 1.01/0.9473  |
| Dihydroxyacetone phosphate (DHAP)     | glycolysis                               | 1.46/0.0016*             | 1.70/0.0027*          | 1.17/0.2044  |
| Phosphoenolpyruvate (PEP)             | glycolysis                               | 1.05/0.2621              | 1.13/0.0390           | 1.08/0.2142  |
| Lactate                               | glycolysis                               | 2.13/0.0022*             | 2.14/0.0016*          | 1.00/0.9807  |
| NADH                                  | oxidative phosphorylation                | 1.08/0.6166              | 1.01/0.9147           | 0.94/0.6663  |
| NAD+                                  | oxidative phosphorylation                | 1.00/0.9730              | 1.35/0.0120*          | 1.35/0.0121# |
| FMN                                   | oxidative phosphorylation                | 1.17/0.0022              | 1.05/0.3583           | 0.90/0.0376  |
| NADPH                                 | pentose phosphate                        | 1.32/0.0454*             | 1.50/0.0038*          | 1.14/0.1481  |
| NADP+                                 | pentose phosphate                        | 1.36/0.0012*             | 1.48/0.0025*          | 1.08/0.3568  |
| GMP                                   | pentose phosphate                        | 1.16/0.3645              | 0.83/0.1034           | 0.71/0.0843  |

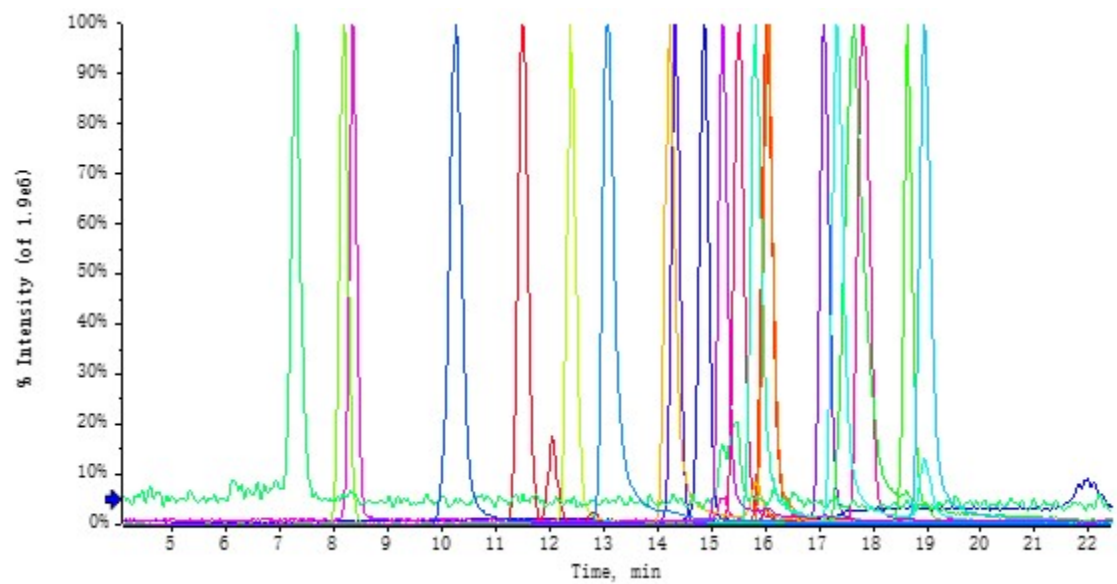

Figure S1. Extracted ion chromatogram (XIC) annotated with each metabolite and retention time for the mixture of standards
